# Supplementary material for: Electronic properties and optical spectra of donor–acceptor conjugated organic polymers
Source: PubMed Central journal article supplement (PMC10703904; doi:10.1038/s41598-023-48468-9), 2023-12-07
Supplement: 41598_2023_48468_MOESM1_ESM.pdf [file 41598_2023_48468_MOESM1_ESM.pdf]

Supporting Information:  
Electronic Properties and Optical Spectra of  
Donor-Acceptor Conjugated Organic Polymers

Chandra Shekar Sarap, Yashpal Singh, John Michael Lane, and Neeraj Rai\*

*Dave C. Swalm School of Chemical Engineering and Center for Advanced Vehicular  
Systems, Mississippi State University, Mississippi State, 39762, Mississippi, USA*

E-mail: \*neerajrai@che.msstate.edu

Table S1: Structural parameters of crystalline phase of 1D and 3D polymers of PE, PET, PCPDT-BT, PCPDT-TTQ, PCPDT-TQ, and PCPDT-BBT computed using DFT. Experimental lattice parameters and densities ( $\rho$ ) for PE and PET are shown in parenthesis. <sup>S1</sup>

|                                                                                | 1D    | 3D              |                |                |                  |                  |                 |                | $\rho$ (g/cm <sup>3</sup> ) | $k$ -points mesh |
|--------------------------------------------------------------------------------|-------|-----------------|----------------|----------------|------------------|------------------|-----------------|----------------|-----------------------------|------------------|
|                                                                                | a'    | a               | b              | c              | $\alpha$         | $\beta$          | $\gamma$        |                |                             |                  |
| PE<br>(C <sub>4</sub> H <sub>8</sub> )                                         | 5.13  | 2.55<br>(2.55)  | 6.75<br>(7.12) | 4.67<br>(4.85) | 90.0<br>(90.0)   | 90.0<br>(90.0)   | 90.0<br>(90.0)  | 1.16<br>(1.05) | 10x4x5                      |                  |
| PET<br>(C <sub>10</sub> O <sub>4</sub> H <sub>8</sub> )                        | 21.77 | 9.68<br>(10.75) | 5.72<br>(5.96) | 3.92<br>(4.56) | 74.88<br>(111.5) | 77.25<br>(112.0) | 74.50<br>(98.5) | 1.60<br>(1.60) | 2x3x4                       |                  |
| PCPDT-BT<br>(C <sub>34</sub> S <sub>6</sub> N <sub>4</sub> H <sub>20</sub> )   | 24.54 | 24.48           | 6.30           | 5.37           | 73.94            | 89.89            | 89.93           | 1.41           | 1x4x5                       |                  |
| PCPDT-TTQ<br>(C <sub>54</sub> S <sub>10</sub> N <sub>8</sub> H <sub>28</sub> ) | 24.12 | 24.48           | 8.01           | 6.95           | 115.48           | 90.0             | 90.0            | 1.50           | 1x3x4                       |                  |
| PCPDT-TQ<br>(C <sub>56</sub> S <sub>6</sub> N <sub>8</sub> H <sub>36</sub> )   | 24.29 | 8.09            | 13.97          | 11.01          | 103.71           | 103.74           | 97.18           | 1.46           | 3x2x2                       |                  |
| PCPDT-BBT<br>(C <sub>48</sub> S <sub>8</sub> N <sub>8</sub> H <sub>24</sub> )  | 24.26 | 9.02            | 12.63          | 9.93           | 92.03            | 116.24           | 91.47           | 1.59           | 3x2x3                       |                  |

Table S2: Electronic eigenstates (eV) and electron occupancies in valence and conduction band along various  $k$ -points in PCPDT-TQ computed using HSE06 method.

| PCPDT-TQ |          |              |           |                 |           |
|----------|----------|--------------|-----------|-----------------|-----------|
|          |          | Valence Band |           | Conduction Band |           |
| NKPTS    | k-points | Energies     | Occupancy | Energies        | Occupancy |
| 1        | 0.00000  | -0.155175    | 0.99999   | 0.218112        | 0.00000   |
| 2        | 0.10179  | -0.533547    | 1.00000   | 0.455730        | 0.00000   |
| 3        | 0.20358  | -0.610803    | 1.00000   | 0.416906        | 0.00000   |
| 4        | 0.30538  | -0.048322    | 0.91415   | 0.069746        | 0.02426   |
| 5        | 0.40717  | -0.169290    | 1.00000   | 0.448957        | 0.00000   |
| 6        | 0.40717  | -0.569562    | 1.00000   | 0.222252        | 0.00000   |
| 7        | 0.46616  | -0.167227    | 1.00000   | 0.221640        | 0.00000   |
| 8        | 0.52514  | -0.162237    | 1.00000   | 0.220172        | 0.00000   |
| 9        | 0.58413  | -0.157246    | 1.00000   | 0.218717        | 0.00000   |
| 10       | 0.64312  | -0.155175    | 0.99999   | 0.218112        | 0.00000   |
| 11       | 0.64312  | -0.155175    | 0.99999   | 0.218112        | 0.00000   |
| 12       | 0.71953  | -0.252590    | 1.00000   | 0.274023        | 0.00000   |
| 13       | 0.79594  | -0.462167    | 1.00000   | 0.367572        | 0.00000   |
| 14       | 0.87236  | -0.714602    | 1.00000   | 0.446298        | 0.00000   |
| 15       | 0.94877  | -0.053905    | 1.00000   | 0.482241        | 0.00000   |
| 16       | 0.94877  | -0.972562    | 0.93633   | -0.015411       | 0.66850   |
| 17       | 1.07198  | -0.515359    | 1.00000   | 0.349057        | 0.00000   |
| 18       | 1.19519  | -0.580288    | 1.00000   | 0.550130        | 0.00000   |
| 19       | 1.31840  | -0.312517    | 1.00000   | 0.355356        | 0.00000   |
| 20       | 1.44162  | -0.155175    | 0.99999   | 0.218112        | 0.00000   |
| 21       | 1.44162  | -0.155175    | 0.99999   | 0.218112        | 0.00000   |
| 22       | 1.52422  | -0.253536    | 1.00000   | 0.272010        | 0.00000   |
| 23       | 1.60682  | -0.464764    | 1.00000   | 0.360155        | 0.00000   |
| 24       | 1.68943  | -0.717957    | 1.00000   | 0.431971        | 0.00000   |
| 25       | 1.77203  | -0.046396    | 1.00000   | 0.463445        | 0.00000   |
| 26       | 1.77203  | -0.976843    | 0.90529   | -0.015369       | 0.66810   |
| 27       | 1.88107  | -0.513585    | 1.00000   | 0.353501        | 0.00000   |
| 28       | 1.99010  | -0.581472    | 1.00000   | 0.555003        | 0.00000   |
| 29       | 2.09914  | -0.309905    | 1.00000   | 0.355612        | 0.00000   |
| 30       | 2.20818  | -0.155175    | 0.99999   | 0.218112        | 0.00000   |
| 31       | 2.20818  | -0.155175    | 0.99999   | 0.218112        | 0.00000   |
| 32       | 2.31557  | -0.532514    | 1.00000   | 0.453721        | 0.00000   |
| 33       | 2.42296  | -0.612653    | 1.00000   | 0.416415        | 0.00000   |
| 34       | 2.53036  | -0.048454    | 0.91473   | 0.068561        | 0.02624   |
| 35       | 2.63775  | -0.566941    | 1.00000   | 0.444709        | 0.000000  |

Table S3: Electronic eigenstates (eV) and electron occupancies in valence and conduction band along various  $k$ -points in PCPDT-BBT computed using HSE06 method.

| PCPDT-BBT |          |              |           |                 |           |
|-----------|----------|--------------|-----------|-----------------|-----------|
|           |          | Valence Band |           | Conduction Band |           |
| NKPTS     | k-points | Energies     | Occupancy | Energies        | Occupancy |
| 1         | 0.00000  | 0.070886     | 0.02248   | 0.419819        | 0.00000   |
| 2         | 0.09715  | -0.154835    | 0.99999   | 0.369137        | 0.00000   |
| 3         | 0.19429  | -0.600328    | 1.00000   | 0.216960        | 0.00000   |
| 4         | 0.29144  | -0.744150    | 1.00000   | -0.021326       | 0.72681   |
| 5         | 0.38858  | 0.057371     | 1.00000   | -0.222148       | 1.00000   |
| 6         | 0.38858  | -0.523277    | 0.05233   | 0.410371        | 0.00000   |
| 7         | 0.45088  | 0.059564     | 0.04602   | 0.411696        | 0.00000   |
| 8         | 0.51317  | 0.064540     | 0.03397   | 0.414975        | 0.00000   |
| 9         | 0.57546  | 0.069117     | 0.0253    | 0.418367        | 0.00000   |
| 10        | 0.63776  | 0.070886     | 0.02248   | 0.419819        | 0.00000   |
| 11        | 0.63776  | 0.070886     | 0.02248   | 0.419819        | 0.00000   |
| 12        | 0.72603  | 0.025730     | 0.23338   | 0.427343        | 0.00000   |
| 13        | 0.81431  | -0.094584    | 0.99627   | 0.448331        | 0.00000   |
| 14        | 0.90259  | -0.269501    | 1.00000   | 0.477172        | 0.00000   |
| 15        | 0.99086  | -1.189682    | 1.00000   | 0.499544        | 0.00000   |
| 16        | 0.99086  | -0.485838    | 1.00000   | 0.445510        | 0.00000   |
| 17        | 1.10700  | -0.576846    | 1.00000   | 0.112739        | 0.00071   |
| 18        | 1.22313  | -0.497748    | 1.00000   | 0.048066        | 0.08700   |
| 19        | 1.33927  | -0.271090    | 1.00000   | 0.328017        | 0.00000   |
| 20        | 1.45541  | 0.070886     | 0.02248   | 0.419819        | 0.00000   |
| 21        | 1.45541  | 0.070886     | 0.02248   | 0.419819        | 0.00000   |
| 22        | 1.56075  | 0.023958     | 0.24901   | 0.425870        | 0.00000   |
| 23        | 1.66610  | -0.100380    | 0.99774   | 0.443554        | 0.00000   |
| 24        | 1.77145  | -0.279169    | 1.00000   | 0.469826        | 0.00000   |
| 25        | 1.87680  | -1.196277    | 1.00000   | 0.492800        | 0.00000   |
| 26        | 1.87680  | -0.496987    | 1.00000   | 0.440332        | 0.00000   |
| 27        | 1.97490  | -0.582804    | 1.00000   | 0.111315        | 0.00082   |
| 28        | 2.07299  | -0.496178    | 1.00000   | 0.047397        | 0.09003   |
| 29        | 2.17109  | -0.270321    | 1.00000   | 0.329907        | 0.00000   |
| 30        | 2.26918  | 0.070886     | 0.02248   | 0.419819        | 0.00000   |
| 31        | 2.26918  | 0.070886     | 0.02248   | 0.419819        | 0.00000   |
| 32        | 2.38214  | -0.155990    | 0.99999   | 0.370633        | 0.00000   |
| 33        | 2.49509  | -0.601150    | 1.00000   | 0.225888        | 0.00000   |
| 34        | 2.60805  | -0.722245    | 1.00000   | -0.007126       | 0.57987   |
| 35        | 2.72100  | -0.480893    | 1.00000   | -0.221307       | 1.00000   |

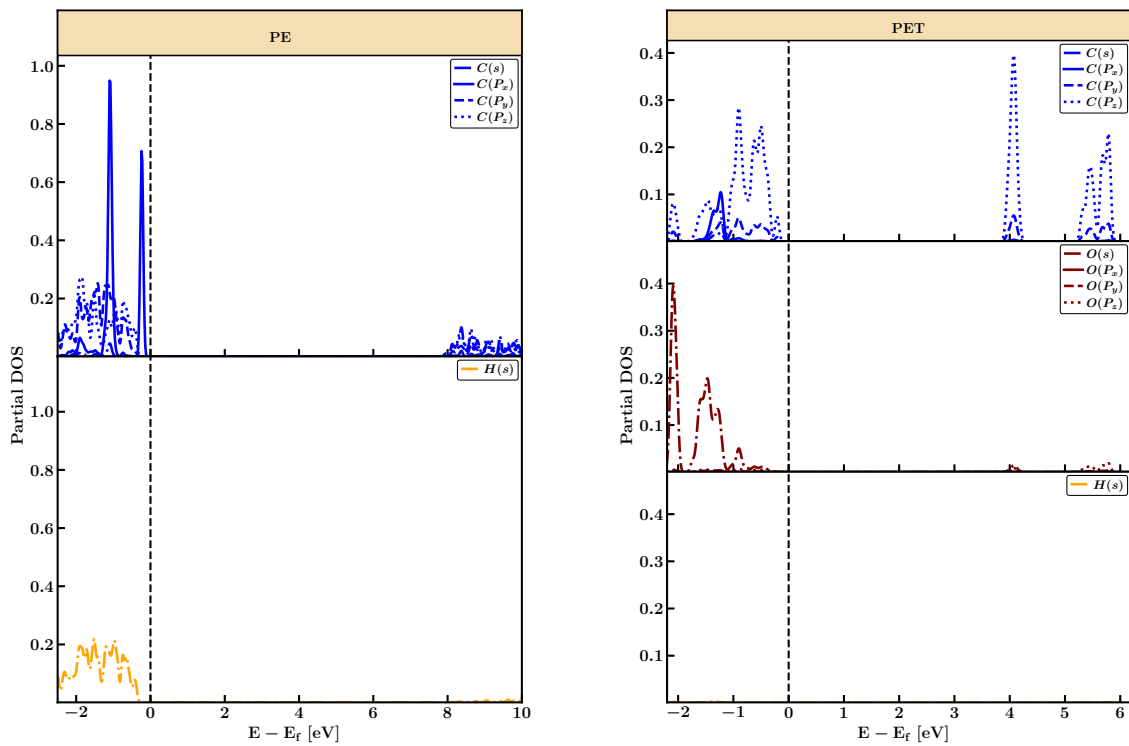

Figure S1: Partial density of states of PE and PET computed using DFT. The relative contributions of the individual orbitals ( $s$ ,  $P_x$ ,  $P_y$  and  $P_z$ ) of the C, O and H atoms are shown.

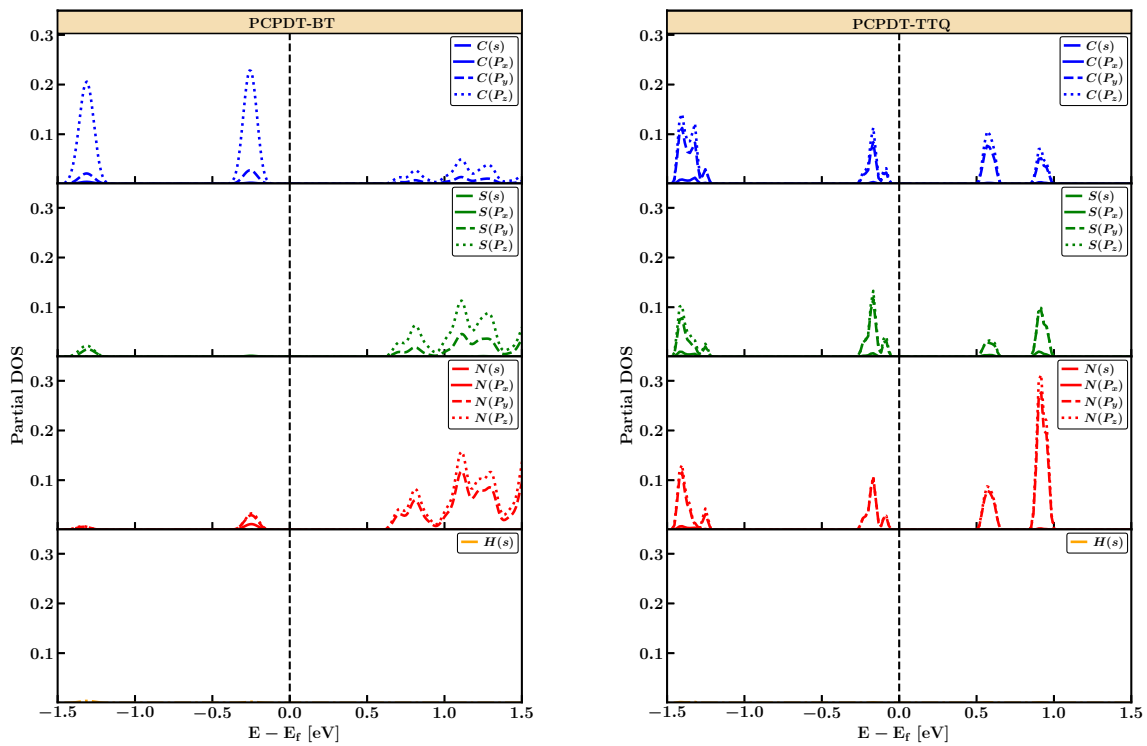

Figure S2: Partial density of states of PCPDT-BT and PCPDT-TTQ computed using DFT. The relative contributions of the individual orbitals (s,  $P_x$ ,  $P_y$  and  $P_z$ ) of the C, S, N, O and H atoms are shown.

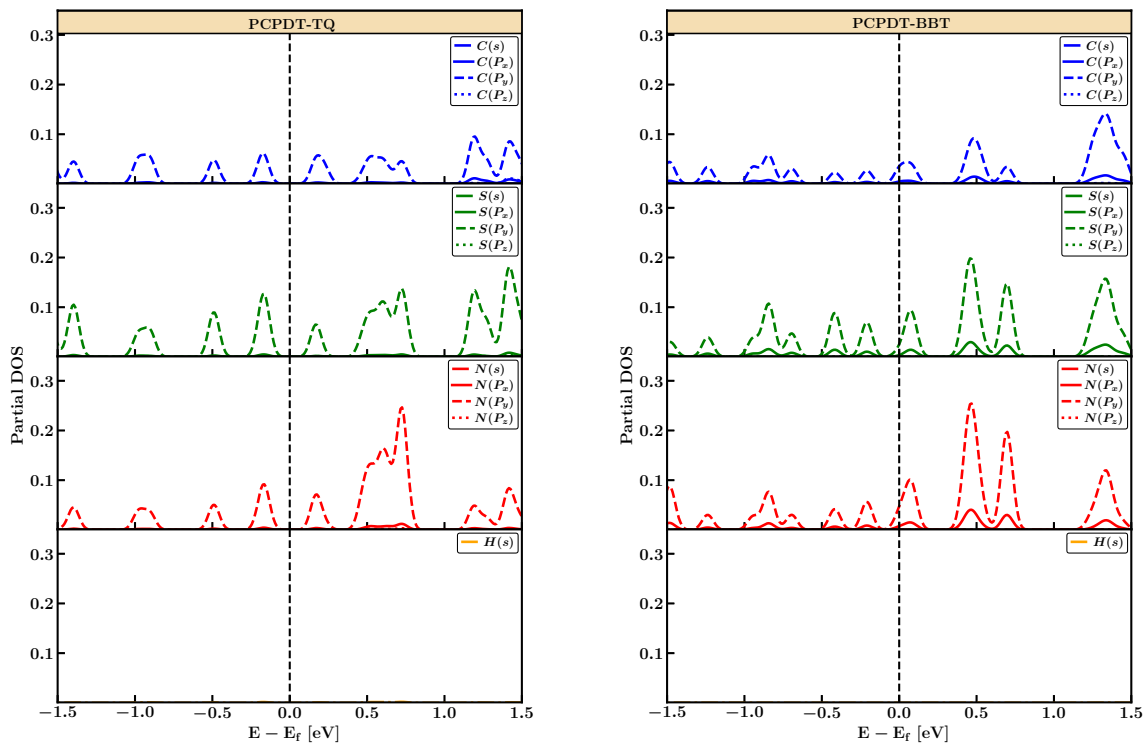

Figure S3: Partial density of states of PCPDT-TQ and PCPDT-BBT computed using DFT. The relative contributions of the individual orbitals (s,  $P_x$ ,  $P_y$  and  $P_z$ ) of the C, S, N, O and H atoms are shown.

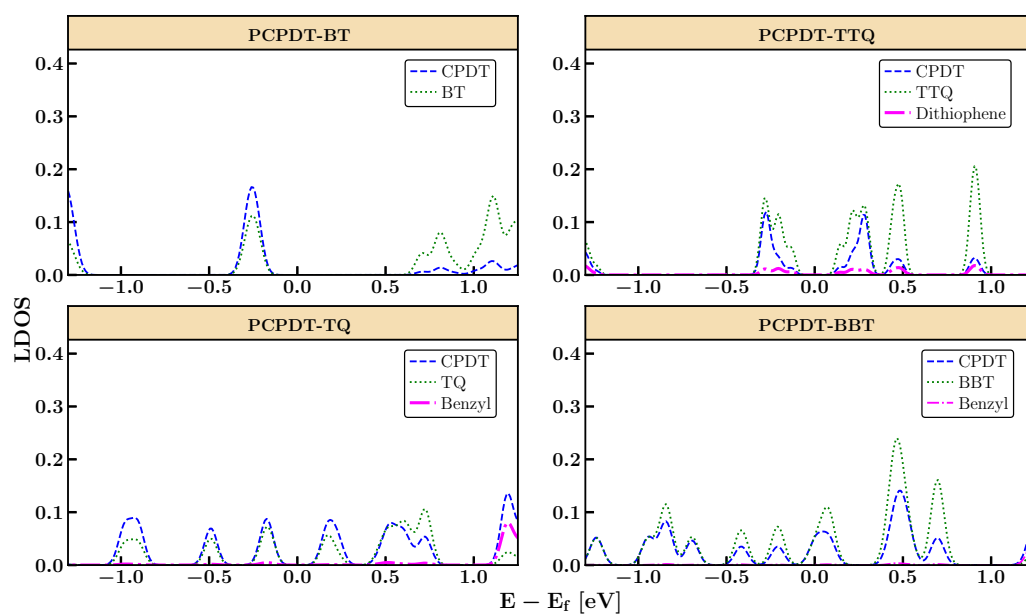

Figure S4: Local density of states (LDOS) of PCPDT-BT, PCPDT-TTQ, PCPDT-TQ and PCPDT-BBT computed using DFT. The relative contributions of the donor, acceptor and substitution units are shown.



Table S4: The band gap computed at  $\Gamma$ -point using  $G_0W_0$ , HSE06 and PBE methods. For PCPDT-TTQ, the band gap at  $G_0W_0$  and PBE are computed with shifted k-point (0.2 -0.1 -0.2). Please see Methodology section in main article for more details.

|           | Electronic Gap at $\Gamma$ -point (eV) |       |       |
|-----------|----------------------------------------|-------|-------|
|           | $G_0W_0$                               | HSE06 | PBE   |
| PE        | 10.286                                 | 9.185 | 7.682 |
| PET       | 6.044                                  | 4.542 | 3.534 |
| PCPDT-BT  | 1.713                                  | 1.188 | 0.650 |
| PCPDT-TTQ | 1.144                                  | 0.757 | 0.429 |
| PCPDT-TQ  | -                                      | 0.373 | 0.232 |
| PCPDT-BBT | -                                      | -     | 0.172 |

Table S5: Macroscopic static dielectric constant ( $\epsilon$ ) computed using density functional perturbation theory (DFPT) and BSE for various polymers. Known experimental dielectric constant values are also shown.<sup>S2-S4</sup>

| Static Dielectric Constant |                 |                 |                 |            |                 |                 |                 |            |            |
|----------------------------|-----------------|-----------------|-----------------|------------|-----------------|-----------------|-----------------|------------|------------|
|                            | DFPT            |                 |                 |            | BSE             |                 |                 |            | Expt.      |
|                            | $\epsilon_{xx}$ | $\epsilon_{yy}$ | $\epsilon_{zz}$ | $\epsilon$ | $\epsilon_{xx}$ | $\epsilon_{yy}$ | $\epsilon_{zz}$ | $\epsilon$ | $\epsilon$ |
| PE                         | 2.85            | 2.88            | 2.89            | 2.87       | 1.75            | 1.80            | 1.98            | 1.84       | 2.25       |
| PET                        | 3.08            | 1.93            | 2.06            | 2.36       | 2.04            | 1.51            | 1.14            | 1.56       | $\sim 3.5$ |
| PCPDT-BT                   | 31.16           | 2.94            | 3.11            | 12.40      | 23.51           | 1.21            | 1.73            | 8.82       | 3.6        |
| PCPDT-TTQ                  | 19.17           | 4.00            | 3.79            | 8.99       | 12.29           | 2.16            | 2.01            | 5.49       | -          |
| PCPDT-TQ                   | 37.72           | 2.68            | 3.48            | 14.62      | 26.80           | 1.68            | 2.06            | 10.18      | -          |
| PCPDT-BBT                  | 89.57           | 3.57            | 2.97            | 32.04      | 37.69           | 2.10            | 1.39            | 13.73      | -          |

Table S6: The number of electrons,  $k$ -points, and empty levels for various polymers considered in  $G_0W_0$  and DFPT calculations.

|           | No. of electrons | No. of $k$ -points | No. of empty levels |      |
|-----------|------------------|--------------------|---------------------|------|
|           |                  |                    | $G_0W_0$            | DFPT |
| PE        | 24               | 84                 | 56                  | 56   |
| PET       | 72               | 32                 | 168                 | 48   |
| PCPDT-BT  | 212              | 6                  | 428                 | 188  |
| PCPDT-TTQ | 344              | 16                 | 696                 | 296  |
| PCPDT-TQ  | 336              | 8                  | 664                 | 304  |
| PCPDT-BBT | 304              | 6                  | 616                 | 216  |

Table S7: Macroscopic static dielectric constant ( $\epsilon$ ) computed using DFPT for PCPDT-TTQ, PCPDT-TQ and PCPDT-BBT with  $\Gamma$ -centered and the Monkhorst-Pack scheme. The shifted k-grid in the Monkhorst-pack is also shown.

|           | $\Gamma$ - Centered  |            | Monkhorst-Pack Scheme |            |
|-----------|----------------------|------------|-----------------------|------------|
|           | k-grid               | $\epsilon$ | k-grid                | $\epsilon$ |
| PCPDT-BT  | 1x3x2                | 12.40      | 1x2x2<br>0.2 0.3 0.1  | 11.55      |
| PCPDT-TTQ | 1x4x4<br>0.2 0.3 0.1 | 9.38       | 1x2x2<br>0.2 0.3 0.1  | 8.99       |
| PCPDT-TQ  | 1x2x4                | 14.62      | 1x2x4<br>0.1 0.3 0.2  | 11.79      |
|           |                      |            | 2x2x7<br>0.1 0.3 0.2  | 12.91      |
| PCPDT-BBT | 1x2x3                | 32.04      | 1x2x2<br>0.1 0.3 0.2  | 32.79      |

Co-ordinates of polymers optimized using PBE method including spin-orbit coupling and van der Waals interactions.

Optimized coordinates of PE

```
C H
4 8
Direct
0.5000000000000000 0.7939120855990751 0.9376661365629175
0.0000000000000000 0.7060859632823124 0.0629998974370807
0.0000000000000000 0.2060879144009249 0.4376661365629175
0.5000000000000000 0.2939140367176876 0.5629998974370807
0.5000000000000000 0.9553966668499640 0.9702888190631285
0.5000000000000000 0.7718434030368897 0.7038105552198175
0.0000000000000000 0.5446023920314147 0.0303791919368734
0.0000000000000000 0.7281567218444920 0.2968554027801815
0.0000000000000000 0.2281565969631103 0.2038105552198175
0.0000000000000000 0.0446033331500360 0.4702888190631285
0.5000000000000000 0.2718432781555080 0.7968554027801815
0.5000000000000000 0.4553976079685853 0.5303791919368734
```

### Optimized coordinates of PET

C H O

10 8 4

Direct

|                    |                    |                    |
|--------------------|--------------------|--------------------|
| 0.6478146033640897 | 0.0692158382322745 | 0.2566720130611486 |
| 0.5155850061096245 | 0.1091193649269471 | 0.1433406459202970 |
| 0.4495072493452312 | 0.9095004273009977 | 0.1967723388229530 |
| 0.5160851398070605 | 0.6716291989554080 | 0.3661861130218824 |
| 0.6483187459171944 | 0.6317265687759601 | 0.4794885631861305 |
| 0.7143538474136406 | 0.8313650387963634 | 0.4262789541789616 |
| 0.8531238069651010 | 0.8006073525557511 | 0.5534508195879582 |
| 0.3106692618267957 | 0.9402390696452372 | 0.0699625494968430 |
| 0.1049304802297044 | 0.2306666597762330 | 0.8629379330651048 |
| 0.0587189681258522 | 0.5103022783426923 | 0.7613719375943901 |
| 0.7026323056467660 | 0.2201863149194665 | 0.2129656909315543 |
| 0.4625835452122047 | 0.2936408911570254 | 0.0123278473273132 |
| 0.4613156292721925 | 0.5206214724517224 | 0.4097181279886968 |
| 0.7013600310838584 | 0.4471702341387456 | 0.6103195383058448 |
| 0.1168171350370173 | 0.1442416300193727 | 0.6364018860229095 |
| 0.0274738250035682 | 0.1509088388613833 | 0.0826027090901036 |
| 0.1362428293224269 | 0.5901116784509455 | 0.5419704791512316 |
| 0.0466494712635637 | 0.5967486336326502 | 0.9879895271547667 |
| 0.9014153090792760 | 0.9726566811208173 | 0.5742209414185950 |
| 0.2623703632130159 | 0.7681792376363603 | 0.0492445479462944 |
| 0.9199386075546911 | 0.5593791930480663 | 0.6444934022522162 |
| 0.2438139259239520 | 0.1814924653580690 | 0.9792795059653869 |

### Optimized coordinates of PCPDT-BT

C S N H

34 6 4 20

Direct

|                    |                    |                    |
|--------------------|--------------------|--------------------|
| 0.3359222438299838 | 0.1571322238739867 | 0.9055967370988682 |
| 0.2887480367790758 | 0.0190156934688730 | 0.0410141603504428 |
| 0.3062382116918769 | 0.8221782768767838 | 0.2153398856350464 |
| 0.3655478705922732 | 0.8220661219331049 | 0.2152177294032853 |
| 0.3830580491784374 | 0.0188419395598203 | 0.0408348610664291 |

|                    |                    |                    |
|--------------------|--------------------|--------------------|
| 0.2046169101810236 | 0.8512883978417847 | 0.1544241600762817 |
| 0.2323843117090121 | 0.0358076586441882 | 0.0071874799939451 |
| 0.4672129296162524 | 0.8511434680409025 | 0.1542815807702240 |
| 0.4394397754873296 | 0.0356177112190537 | 0.0069821029332644 |
| 0.3358912606616542 | 0.3941893768242863 | 0.9280665069016365 |
| 0.3360069165467863 | 0.1538814716724133 | 0.6201209621778858 |
| 0.1460256209040054 | 0.8194743600585497 | 0.1506503955238756 |
| 0.1155508736063666 | 0.9367418366362301 | 0.9259926382059049 |
| 0.1147683273972504 | 0.6912309950135551 | 0.3542720626904767 |
| 0.0564319786919683 | 0.9367774759999392 | 0.9259373683926029 |
| 0.0570115463303225 | 0.6912365956644138 | 0.3542089754509306 |
| 0.0258406229405921 | 0.8194581501433120 | 0.1505848450547305 |
| 0.8359222438299838 | 0.1571322238739867 | 0.9055967370988682 |
| 0.7887480367790758 | 0.0190156934688730 | 0.0410141603504428 |
| 0.8062382116918769 | 0.8221782768767838 | 0.2153398856350464 |
| 0.8655478705922732 | 0.8220661219331049 | 0.2152177294032853 |
| 0.8830580491784374 | 0.0188419395598203 | 0.0408348610664291 |
| 0.7046169101810236 | 0.8512883978417847 | 0.1544241600762817 |
| 0.7323843117090121 | 0.0358076586441882 | 0.0071874799939451 |
| 0.9672129296162524 | 0.8511434680409025 | 0.1542815807702240 |
| 0.9394397754873296 | 0.0356177112190537 | 0.0069821029332644 |
| 0.8358912606616542 | 0.3941893768242863 | 0.9280665069016365 |
| 0.8360069165467863 | 0.1538814716724133 | 0.6201209621778858 |
| 0.6460256209040054 | 0.8194743600585497 | 0.1506503955238756 |
| 0.6155508736063666 | 0.9367418366362301 | 0.9259926382059049 |
| 0.6147683273972433 | 0.6912309950135551 | 0.3542720626904767 |
| 0.5564319786919683 | 0.9367774759999392 | 0.9259373683926029 |

|                    |                    |                    |
|--------------------|--------------------|--------------------|
| 0.5570115463303225 | 0.6912365956644138 | 0.3542089754509306 |
| 0.5258406229405921 | 0.8194581501433120 | 0.1505848450547305 |
| 0.2506813121897125 | 0.6574958645540789 | 0.3420358481732748 |
| 0.4211151324843740 | 0.6573617535932286 | 0.3418925199341203 |
| 0.0861148428881577 | 0.1512935042969730 | 0.5088145684364846 |
| 0.7506813121897125 | 0.6574958645540789 | 0.3420358481732748 |
| 0.9211151324843740 | 0.6573617535932286 | 0.3418925199341203 |
| 0.5861148428881577 | 0.1512935042969730 | 0.5088145684364846 |
| 0.1370422441027230 | 0.0551393518801859 | 0.6975875131786822 |
| 0.0350797983014388 | 0.0552058286382433 | 0.6975010506633410 |
| 0.6370422441027230 | 0.0551393518801859 | 0.6975875131786822 |
| 0.5350797983014388 | 0.0552058286382433 | 0.6975010506633410 |
| 0.2116109594258759 | 0.1746173451789943 | 0.8764026478152473 |
| 0.4602139978046083 | 0.1744741834272716 | 0.8762112767265933 |
| 0.3722979309323549 | 0.4838470067897447 | 0.8352419005459240 |
| 0.2995371407104699 | 0.4841223609269250 | 0.8352421120904339 |
| 0.3358246284568622 | 0.3963580954815811 | 0.1305790808807643 |
| 0.2994324206368475 | 0.2365579136477223 | 0.5208145405195168 |
| 0.3726057762473189 | 0.2364675309228517 | 0.5206593434268854 |
| 0.3360514281031897 | 0.9837941332413109 | 0.6057727124725005 |
| 0.1356486028040678 | 0.5986194795310738 | 0.5302872986920661 |
| 0.0360477282707876 | 0.5985635194185903 | 0.5302456347183337 |
| 0.7116109594258759 | 0.1746173451789943 | 0.8764026478152473 |
| 0.9602139978046154 | 0.1744741834272716 | 0.8762112767265933 |
| 0.8722979309323549 | 0.4838470067897447 | 0.8352419005459240 |
| 0.7995371407104699 | 0.4841223609269250 | 0.8352421120904339 |
| 0.8358246284568551 | 0.3963580954815811 | 0.1305790808807643 |

|                    |                    |                    |
|--------------------|--------------------|--------------------|
| 0.7994324206368546 | 0.2365579136477223 | 0.5208145405195168 |
| 0.8726057762473189 | 0.2364675309228517 | 0.5206593434268854 |
| 0.8360514281031897 | 0.9837941332413109 | 0.6057727124725005 |
| 0.6356486028040678 | 0.5986194795310738 | 0.5302872986920661 |
| 0.5360477282707876 | 0.5985635194185903 | 0.5302456347183337 |

### Optimized coordinates of PCPDT-TTQ

C S N H

54 10 8 28

Direct

|                    |                    |                    |
|--------------------|--------------------|--------------------|
| 0.2547986926451458 | 0.0138777278199811 | 0.9723123559081657 |
| 0.2817723802934751 | 0.1198649693989751 | 0.8825178344547027 |
| 0.3377822732452671 | 0.1178741792169617 | 0.8995600645750201 |
| 0.3566944026430363 | 0.0133366830427306 | 0.0071097885055877 |
| 0.5170654803544679 | 0.0493298695389512 | 0.9938818708019994 |
| 0.4876469174154749 | 0.1400244893672138 | 0.8915833901685346 |
| 0.4319606037934705 | 0.1295937611163822 | 0.9081299007173342 |
| 0.4148750583650838 | 0.0233532499716489 | 0.0157248487654584 |
| 0.3843353140608201 | 0.2032075594480176 | 0.8295272764847681 |
| 0.0750037971778426 | 0.9594929951761344 | 0.9915523601805702 |
| 0.1015229897252041 | 0.0466093213385790 | 0.8749303238808039 |
| 0.1605754476716612 | 0.0580201053764497 | 0.8613351105225746 |
| 0.1972004809134944 | 0.9890950269914640 | 0.9730478342471258 |
| 0.1709100392876621 | 0.8931926406363075 | 0.0810473433544274 |
| 0.1122557435883849 | 0.8726635265523086 | 0.0831375655865543 |
| 0.1237674969378517 | 0.6912052547844709 | 0.2706645252451381 |
| 0.1820800575027377 | 0.7154260572469298 | 0.2734266410530211 |

|                    |                    |                    |
|--------------------|--------------------|--------------------|
| 0.2215374677525048 | 0.6359889859517125 | 0.3684675624878793 |
| 0.2736433255929356 | 0.7041903922658079 | 0.4386604708190660 |
| 0.3040164743925828 | 0.5928731979836712 | 0.5118837918903338 |
| 0.2751969268088459 | 0.4384240233085848 | 0.4931294088580458 |
| 0.0925133455016578 | 0.5925677321249054 | 0.3700213243026482 |
| 0.0962461895456954 | 0.5953420149571045 | 0.5699234172367369 |
| 0.0510350700523858 | 0.5105452238444173 | 0.6202071522694439 |
| 0.0140938509068675 | 0.4379337635820661 | 0.4550503875019487 |
| 0.3816924023463173 | 0.4166375734139791 | 0.9407400427048742 |
| 0.3872690375523220 | 0.1330590750131435 | 0.5863050381668202 |
| 0.7548027326245261 | 0.9860883149975734 | 0.0271147598301908 |
| 0.7817413568825771 | 0.8799448515781663 | 0.1167359629298730 |
| 0.8377538822371733 | 0.8822921878348069 | 0.1000592871380164 |
| 0.8566419438246058 | 0.9871972930409214 | 0.9929108313006907 |
| 0.0169870535579548 | 0.9512816917127722 | 0.0057586926508293 |
| 0.9876102363532340 | 0.8600355937403421 | 0.1075824048191052 |
| 0.9319283549896085 | 0.8708318647892526 | 0.0915798935541403 |
| 0.9148166110459997 | 0.9775743896913553 | 0.9846375151175621 |
| 0.8843021258876789 | 0.7971868793089740 | 0.1703020494989147 |
| 0.5750733739623186 | 0.0411630729661212 | 0.0083507666247016 |
| 0.6015524970153692 | 0.9538390170141255 | 0.1247443932838408 |
| 0.6605982509367507 | 0.9422521447094780 | 0.1382018486629306 |
| 0.6972398239688573 | 0.0111519950982668 | 0.0265858823256906 |
| 0.6709820021187127 | 0.1073113553742999 | 0.9189036911183024 |
| 0.6123530445134691 | 0.1280230710095580 | 0.9170057033336505 |
| 0.6238285449018832 | 0.3093710353601438 | 0.7295749422871012 |
| 0.6821420700489682 | 0.2850958080276058 | 0.7265792032695089 |



|                    |                    |                    |
|--------------------|--------------------|--------------------|
| 0.7214985105982024 | 0.3642838502215255 | 0.6307329454496866 |
| 0.7734946691964382 | 0.2958703132810285 | 0.5592727227462575 |
| 0.8037172732456455 | 0.4067806916043679 | 0.4849322508617391 |
| 0.7749431902013484 | 0.5614593429666144 | 0.5043848904315738 |
| 0.5925427492654194 | 0.4077970475128012 | 0.6300930138037728 |
| 0.5962120489210818 | 0.4048767115965859 | 0.4301036979483825 |
| 0.5509941129949212 | 0.4895364935593065 | 0.3797570393408876 |
| 0.5140830648210937 | 0.5620556443602567 | 0.5448778338846125 |
| 0.8817141135857085 | 0.5837411638776899 | 0.0596389563082198 |
| 0.8873284574366735 | 0.8676442132025457 | 0.4135886474212427 |
| 0.3028400956710584 | 0.9155418695975825 | 0.0846395271062690 |
| 0.4704808846346253 | 0.9457292395793715 | 0.1080119377078148 |
| 0.1204046160921948 | 0.1877353946544460 | 0.6408466860733526 |
| 0.2115199947854762 | 0.4307089951700860 | 0.3907829213357630 |
| 0.0332333548765078 | 0.4794004362395228 | 0.2432607598260930 |
| 0.8028094191958388 | 0.0846950168308425 | 0.9150728040120342 |
| 0.9703914799811599 | 0.0553482758448496 | 0.8922725015226476 |
| 0.6203726328349575 | 0.8123502724579836 | 0.3584985940426080 |
| 0.7114869549594047 | 0.5696830730333815 | 0.6086059486560913 |
| 0.5332513587210599 | 0.5207794260081968 | 0.7567760511987984 |
| 0.1754832635496797 | 0.1354884779429568 | 0.7312068836530585 |
| 0.0745563644256748 | 0.1172220632002237 | 0.7579148230412542 |
| 0.0922767545776040 | 0.7668515301012775 | 0.1733695177572088 |
| 0.2030027255717783 | 0.8146421854857238 | 0.1776257703777944 |
| 0.6754937314238489 | 0.8645510946435451 | 0.2681427690725542 |
| 0.5745719932534001 | 0.8830880612836793 | 0.2415854234416841 |
| 0.5923485939321296 | 0.2339395275502696 | 0.8270593138840852 |

|                    |                    |                    |
|--------------------|--------------------|--------------------|
| 0.7030754373784234 | 0.1858299018658940 | 0.8222742204061362 |
| 0.2589762429379832 | 0.1919783411867542 | 0.8074961060603840 |
| 0.5087796355505105 | 0.2105928478622374 | 0.8111594930854906 |
| 0.2880463137388460 | 0.8327001768440070 | 0.4391860461370101 |
| 0.3449218124132187 | 0.6259783646824602 | 0.5792761157177750 |
| 0.1299550495364912 | 0.6601233405404727 | 0.6778552077876085 |
| 0.0455770392107411 | 0.5055222692039436 | 0.7729103464022558 |
| 0.3448750628365218 | 0.4667431023456885 | 0.8915529809550051 |
| 0.4177539164769613 | 0.4763728709234130 | 0.8995078144707591 |
| 0.3508022964864423 | 0.1723975113862366 | 0.5239534090325577 |
| 0.3906148296745826 | 0.9814943916796466 | 0.5070991484760228 |
| 0.7589048379325760 | 0.8076227343322060 | 0.1914514086733945 |
| 0.0087952872735357 | 0.7891791669870685 | 0.1874976528915582 |
| 0.7879347776662371 | 0.1673749290136257 | 0.5586068568047509 |
| 0.8445586045790563 | 0.3734870298528179 | 0.4170278345112095 |
| 0.6299050234950130 | 0.3402471446993403 | 0.3221753168415660 |
| 0.5455183210135957 | 0.4945148981764831 | 0.2270585740271258 |
| 0.8449214675809671 | 0.5336423635811585 | 0.1089844486222447 |
| 0.9177881295512051 | 0.5245157464776042 | 0.1014152743924015 |
| 0.8509052858846644 | 0.8284099632844857 | 0.4763315791848513 |
| 0.8907252888966184 | 0.0191935886775241 | 0.4925999929544247 |
| 0.8802344522001277 | 0.5330381618370907 | 0.8857487272122455 |
| 0.9232806674145948 | 0.8097149992864630 | 0.4576509129187158 |
| 0.4231767436936806 | 0.1911543516650980 | 0.5421259410495409 |
| 0.3801557063224763 | 0.4669736043926704 | 0.1145799045258542 |
| 0.2874955051463388 | 0.3291244466827905 | 0.5366592536755093 |
| 0.9771673136708827 | 0.3596634252768354 | 0.4465110911871548 |

0.7872397616601745 0.6706591812053304 0.4606140429344876  
0.4771576100816972 0.6401707685213083 0.5532706097217996

### Optimized coordinates of PCPDT-TQ

C S N H

56 6 8 36

Direct

0.7297832930292714 0.9724239331672990 0.2151719711183659  
0.7618701182185248 0.8802148883430121 0.2384885193499855  
0.9323519061950236 0.8821449719238075 0.3006561788469284  
0.0390545241068949 0.9778020807838530 0.3205431586086362  
0.5096392384430501 0.9552069814174970 0.4823702612805576  
0.3829720486159971 0.8677083080444490 0.4569923464659169  
0.2177759276300790 0.8772496655957198 0.3972160637126834  
0.2114250795452222 0.9738980766053444 0.3764569131385542  
0.0411510033638862 0.8165400065667896 0.3528154987863701  
0.5443777647259154 0.5981372013543336 0.3284640849562521  
0.5802480429098651 0.5217412314279528 0.3869755614891162  
0.7502094561966857 0.5078370145458777 0.4303108833860847  
0.8842520869795862 0.5729272165633716 0.4156880991313514  
0.8552235405724815 0.6548623322540337 0.3643154012734300  
0.6818624795749031 0.6646361668874547 0.3190990427972835  
0.0096239183140128 0.7246261138010652 0.3746387871602437  
0.3598592461746435 0.6068045716794899 0.2743734198527150  
0.7876488087056899 0.4261859622190229 0.4934961890371383  
0.2165236964157629 0.0342623615086382 0.0457046176607250  
0.2406366223966572 0.9385158040358306 0.0655927867459738

|                    |                    |                    |
|--------------------|--------------------|--------------------|
| 0.4086942978868962 | 0.9159094528441756 | 0.1189931108478675 |
| 0.5650932910648905 | 0.9906580711842352 | 0.1588379008033982 |
| 0.5405388807796569 | 0.0869570335103234 | 0.1401017452133217 |
| 0.3740841308346745 | 0.1094501869249598 | 0.0885765775744716 |
| 0.5092455360695212 | 0.2727598856249074 | 0.1119692446320073 |
| 0.6747822758074236 | 0.2496609479732541 | 0.1589617349955503 |
| 0.8433245068997550 | 0.3213780329293954 | 0.1910592140757501 |
| 0.4790676947173722 | 0.3720594857273198 | 0.0910460401227482 |
| 0.2549849714267722 | 0.0314162173701433 | 0.7215874749175484 |
| 0.3699701574155014 | 0.1227433800957769 | 0.7419237754606200 |
| 0.5409327214860085 | 0.1206318482474558 | 0.7962974223020822 |
| 0.5609819575981376 | 0.0264605487938780 | 0.8221259051608101 |
| 0.0509965762467246 | 0.0507216050641688 | 0.9864985371552564 |
| 0.0063159153946373 | 0.1383940537903072 | 0.9532363351313577 |
| 0.8317289906442014 | 0.1280847980329085 | 0.8948239237883229 |
| 0.7361141454106672 | 0.0311203989934867 | 0.8812999134670321 |
| 0.7117279792477689 | 0.1883555359840585 | 0.8406353407429137 |
| 0.4021682838342500 | 0.3643602582299437 | 0.6103321597895217 |
| 0.3881209429439920 | 0.4542657613218637 | 0.6928112201961767 |
| 0.4973701679595806 | 0.4924982540340466 | 0.8202152479992222 |
| 0.6256090811226755 | 0.4401262280143285 | 0.8630018787344227 |
| 0.6338434225329408 | 0.3456047974683045 | 0.7862660518711948 |
| 0.5225002023052028 | 0.3096296040256448 | 0.6596697574299952 |
| 0.7536902872592179 | 0.2858078116961309 | 0.8406160488366297 |
| 0.2904131606122533 | 0.3248152849151609 | 0.4719114937029545 |
| 0.4702069788721346 | 0.5842088508106045 | 0.9116111840758165 |
| 0.6897145582348472 | 0.9710961786246983 | 0.5426221179487385 |

|                    |                    |                    |
|--------------------|--------------------|--------------------|
| 0.8007265555818179 | 0.0642619518421128 | 0.5592806002264368 |
| 0.9858786124456245 | 0.0860764662178752 | 0.6206695006064535 |
| 0.0739729015355906 | 0.0123682422686286 | 0.6647770256318424 |
| 0.9623858418515994 | 0.9193932890472851 | 0.6496590925713477 |
| 0.7768230976280179 | 0.9010300904448485 | 0.5993356880155503 |
| 0.7616798080764369 | 0.7557258371216733 | 0.6672884315596264 |
| 0.9456292744756993 | 0.7661666573044030 | 0.6979729293296018 |
| 0.0365930729790946 | 0.6882901892537205 | 0.7419887624485071 |
| 0.6533186382647784 | 0.6764372939680214 | 0.7004753999173872 |
| 0.9244678495237721 | 0.0636249916753968 | 0.2689829223770630 |
| 0.4112731627430648 | 0.0506608308278587 | 0.4275158803055277 |
| 0.1927875750546875 | 0.7679956633581000 | 0.0762428147732166 |
| 0.3687932652260244 | 0.9415783392568429 | 0.7755602982780445 |
| 0.8632388738042849 | 0.9543238324834959 | 0.9402635952098635 |
| 0.9075192017720966 | 0.2338264426986285 | 0.5667366730779548 |
| 0.3971594798695648 | 0.8208940711388450 | 0.1279700161367003 |
| 0.1093365744525343 | 0.8603836604858444 | 0.0371600453318095 |
| 0.3661907647208480 | 0.2035146646083916 | 0.0802343049459395 |
| 0.6840619763604536 | 0.1585563181143925 | 0.1739668893896820 |
| 0.0593701271484335 | 0.1804578883298262 | 0.6305225035369091 |
| 0.7422033274786486 | 0.1421941147605352 | 0.5236612794453492 |
| 0.6827257881052660 | 0.8192517922197098 | 0.6136678646076419 |
| 0.0398077754709192 | 0.8476172258779968 | 0.6897919065848086 |
| 0.6545921788859346 | 0.8172390150854483 | 0.2056069583674613 |
| 0.4212606473661751 | 0.8034234706232084 | 0.4874691825318322 |
| 0.4736531011303029 | 0.4713625079016666 | 0.3978983840351233 |
| 0.0176885480645907 | 0.5629453845960413 | 0.4496743527225391 |

|                    |                    |                    |
|--------------------|--------------------|--------------------|
| 0.6522252206274644 | 0.7264921467197780 | 0.2797639103722673 |
| 0.3123647607314837 | 0.5665584412480271 | 0.1699627301007496 |
| 0.3465871405789258 | 0.6852319679832775 | 0.2839303697203377 |
| 0.2734249850574315 | 0.5733244528352444 | 0.3228492629526869 |
| 0.9253633453121353 | 0.4217968657831648 | 0.5131904071517823 |
| 0.7122782795852203 | 0.3524656432241571 | 0.4313943400917495 |
| 0.7535039260172454 | 0.4381568324322913 | 0.5862220642326577 |
| 0.1279671242741500 | 0.7013918402795696 | 0.4196860876951831 |
| 0.8864704615371224 | 0.3171854516723656 | 0.1027392137809713 |
| 0.9431386263826909 | 0.3001382342404995 | 0.2606859210830237 |
| 0.8336113481534753 | 0.3995294425721099 | 0.2309155632716156 |
| 0.4346907433062484 | 0.3638534740073425 | 0.9860737709483161 |
| 0.5937156933142731 | 0.4320246305036335 | 0.1330510969859233 |
| 0.3751986499209110 | 0.3949409091888327 | 0.1331052065525995 |
| 0.3216189544438137 | 0.1857759014175144 | 0.7148728355428418 |
| 0.1065972850156598 | 0.2039586800316044 | 0.9738037059646132 |
| 0.2908580516835002 | 0.4963864203516195 | 0.6572491067275053 |
| 0.7137352022201497 | 0.4700881509063919 | 0.9610004974203079 |
| 0.5318612854331661 | 0.2380696773508291 | 0.5980294706050344 |
| 0.2113729323167561 | 0.3784842741062633 | 0.4430757787070903 |
| 0.2019714945746998 | 0.2542303320706765 | 0.4584097202385635 |
| 0.3689597178842234 | 0.3077782984123871 | 0.4033773656736059 |
| 0.3766070121890408 | 0.5623373798451397 | 0.9630309795618501 |
| 0.4171177344111499 | 0.6368431080605461 | 0.8603533912096992 |
| 0.5903211210442052 | 0.6247695474345392 | 0.9865297090456977 |
| 0.8876722581991174 | 0.3248548229398409 | 0.8898918787701220 |
| 0.1770988769743198 | 0.7156606400610741 | 0.7733929297939923 |

|                    |                    |                    |
|--------------------|--------------------|--------------------|
| 0.0055918290963604 | 0.6181347725664494 | 0.6632042466203245 |
| 0.9954042378911865 | 0.6694221048090299 | 0.8229302258963997 |
| 0.6824920031191013 | 0.6919207548354009 | 0.8069790861813289 |
| 0.6784463321707506 | 0.6011371341071055 | 0.6636839746780083 |
| 0.5155254297959360 | 0.6762680355362676 | 0.6611707086849350 |

### Optimized coordinates of PCPDT-BBT

C S N H

48 8 8 24

Direct

|                    |                    |                    |
|--------------------|--------------------|--------------------|
| 0.8868886475180489 | 0.0893178939541670 | 0.0466928421395352 |
| 0.7702817628694376 | 0.1149528153626278 | 0.1072436216938470 |
| 0.9213399689775770 | 0.9832353812651107 | 0.0159662922857251 |
| 0.6799234486081929 | 0.0342396118631001 | 0.1432047730857633 |
| 0.7168099604939258 | 0.9285102827458900 | 0.1142498118383060 |
| 0.8311923144945794 | 0.9029694549621112 | 0.0522099488704200 |
| 0.5662797089274818 | 0.0540919328843543 | 0.2022059632562545 |
| 0.5183713018062193 | 0.1538922319403255 | 0.2359171350776847 |
| 0.4063355503319173 | 0.1469526069977221 | 0.2964981395779418 |
| 0.3639632789316565 | 0.0376985611973950 | 0.3067173053094052 |
| 0.0416411813126700 | 0.0396990546776195 | 0.4657619974124927 |
| 0.0999485589939368 | 0.1418532433776747 | 0.4502249078345812 |
| 0.2153790707959260 | 0.1380250602356909 | 0.3945665713828461 |
| 0.2485459399139103 | 0.0323750512275112 | 0.3646883180015479 |
| 0.3131073431891380 | 0.2141682502982576 | 0.3540475285008782 |
| 0.5676888957798880 | 0.5038631804948039 | 0.2699742684620503 |
| 0.4872320409668234 | 0.5986360525976906 | 0.2629827833976677 |

|                    |                    |                    |
|--------------------|--------------------|--------------------|
| 0.3522160608688480 | 0.6037428155056617 | 0.2971288000830299 |
| 0.2945364787472400 | 0.5109052169506541 | 0.3338396241545070 |
| 0.3689414462179101 | 0.4134780771028730 | 0.3374046727264428 |
| 0.5080704776668910 | 0.4128701308505853 | 0.3086837031762713 |
| 0.2975834583277859 | 0.3204881296416531 | 0.3712265767917273 |
| 0.7140365501657442 | 0.4972914931878094 | 0.2359139893744242 |
| 0.2751519901461776 | 0.7075536624265126 | 0.2986753118965666 |
| 0.8749140800240269 | 0.9104313668331088 | 0.5357911844821999 |
| 0.7543053471620169 | 0.8853386077612058 | 0.5922134607044569 |
| 0.9245138269895676 | 0.0162575319525970 | 0.5197505785908660 |
| 0.6743881636686169 | 0.9663123775455205 | 0.6381720233980843 |
| 0.7263819390932795 | 0.0718955281681204 | 0.6242795421044534 |
| 0.8457390173397101 | 0.0969492199988196 | 0.5671485479952167 |
| 0.5577014961681641 | 0.9465189014612392 | 0.6939614918183139 |
| 0.4962903100985088 | 0.8464220245923926 | 0.7129296296115371 |
| 0.3860144694691172 | 0.8525148280135753 | 0.7754676996577103 |
| 0.3579117242214593 | 0.9616426825946931 | 0.8009059321581162 |
| 0.0344541720742413 | 0.9591792292249366 | 0.9580427173350330 |
| 0.0772878860695485 | 0.8568749923122141 | 0.9267599331507483 |
| 0.1933006829675818 | 0.8606079665814761 | 0.8715493228951416 |
| 0.2421870296589930 | 0.9663954078641694 | 0.8583286972818911 |
| 0.2843089142694879 | 0.7847495420448496 | 0.8238818978019395 |
| 0.5586372700359163 | 0.4990589019864231 | 0.7713801668467184 |
| 0.5016169871834535 | 0.4010374480727350 | 0.7973521391684599 |
| 0.3689224841573520 | 0.3936071347984793 | 0.8348790133715056 |
| 0.2917666528896206 | 0.4861288253448137 | 0.8439707266928238 |
| 0.3440117040742479 | 0.5858382582976276 | 0.8163704613046221 |



|                    |                    |                    |
|--------------------|--------------------|--------------------|
| 0.4779152706776557 | 0.5895692202882259 | 0.7802044042088667 |
| 0.2646137522585192 | 0.6785547918803587 | 0.8376477225565466 |
| 0.7045885126002389 | 0.5103577859373516 | 0.7369499038804577 |
| 0.3126173710220641 | 0.2887538676784231 | 0.8675155393889256 |
| 0.8863749843653466 | 0.2790320702465934 | 0.0715764152808944 |
| 0.7217980931352201 | 0.7391606794582017 | 0.0940635818109854 |
| 0.8500004925970472 | 0.7209281564052219 | 0.5375760760436208 |
| 0.7592359329267637 | 0.2611563585903482 | 0.6318617897639740 |
| 0.1367918878217367 | 0.9385552069177905 | 0.4071379409783304 |
| 0.4641654506735691 | 0.9488673161897623 | 0.2460370935916671 |
| 0.1446539445106509 | 0.0601565228329406 | 0.9152776514972487 |
| 0.4695603209408290 | 0.0512052564197347 | 0.7529063419077886 |
| 0.7598013468229681 | 0.2201078869438930 | 0.1251958193515321 |
| 0.9597116037530569 | 0.1759569909198788 | 0.0227121959001266 |
| 0.6481915108166518 | 0.8417766972515111 | 0.1428324716843008 |
| 0.8428937544451927 | 0.7977404663575456 | 0.0356345740687729 |
| 0.7301303972312283 | 0.7802982624443686 | 0.5971931074651806 |
| 0.9368916209529132 | 0.8235168435418601 | 0.5015673385311459 |
| 0.6694279475525988 | 0.1587648290524655 | 0.6644484464235205 |
| 0.8732368222984306 | 0.2021049467821854 | 0.5664016359455246 |
| 0.5692294517741558 | 0.2250863428469856 | 0.2113937763377720 |
| 0.0533403104909738 | 0.2128473307707424 | 0.4798355947776471 |
| 0.5306807690140829 | 0.6712980684194534 | 0.2327059142373074 |
| 0.1893468146666208 | 0.5133555994804908 | 0.3605588433779019 |
| 0.5740606689350614 | 0.3405789736473679 | 0.3206677605427402 |
| 0.7758208728592422 | 0.4226171140793156 | 0.2727139834839107 |
| 0.8049690874044586 | 0.5634695387537860 | 0.2911971544338101 |

|                    |                    |                    |
|--------------------|--------------------|--------------------|
| 0.6746999938560450 | 0.4998474428534934 | 0.1141921179029524 |
| 0.2549385388912029 | 0.7521145702082066 | 0.1994717900153233 |
| 0.3574006827037621 | 0.7577483919814156 | 0.3982710725189094 |
| 0.1560833583822614 | 0.6967314299779801 | 0.3025701065847102 |
| 0.2091873330717746 | 0.3394332284080477 | 0.4154721871460936 |
| 0.5375447634429307 | 0.7759244677514872 | 0.6767580786438145 |
| 0.0198741095265831 | 0.7860567158908296 | 0.9456467237088333 |
| 0.5629449822999817 | 0.3287076269711520 | 0.7918084087698460 |
| 0.1915250466463263 | 0.4819016215915184 | 0.8774169270925825 |
| 0.5250543078819874 | 0.6652512873102623 | 0.7642132397605650 |
| 0.7558642318009063 | 0.5924438167309916 | 0.7608899562081177 |
| 0.6681339879317036 | 0.4903041319094612 | 0.6173187147509225 |
| 0.8030699472068576 | 0.4578880303613104 | 0.8032020385784477 |
| 0.4175287888716284 | 0.2377666471489590 | 0.9218318719817375 |
| 0.2222376414845684 | 0.2463216911483883 | 0.7634863225661022 |
| 0.2527727597518563 | 0.2988285707848846 | 0.9420542862744483 |
| 0.1730404947260809 | 0.6596442975596304 | 0.8786881147698153 |

## References

- (S1) Mark, J. *Polymer Data Handbook*; Oxford University Press: Oxford, U.K., 2009.
- (S2) Armin, A.; Stoltzfus, D. M.; Donaghey, J. E.; Clulow, A. J.; Nagiri, R. C. R.; Burn, P. L.; Gentle, I. R.; Meredith, P. Engineering dielectric constants in organic semiconductors. *J. Mater. Chem. C* **2017**, *5*, 3736–3747.
- (S3) Sears, F. W.; Zemansky, M. W.; Young, H. D. *University Physics, 6th Ed.*; Addison Wesley, 1982.

- (S4) Konieczna, M.; Markiewicz, E.; Jurga, J. Dielectric properties of polyethylene terephthalate/polyphenylene sulfide/barium titanate nanocomposite for application in electronic industry. *Polymer Engineering & Science* **2010**, *50*, 1613–1619.
